# Supplementary material for: The perturbed expression of m6A in parthenogenetic mouse embryos
Source: PubMed Central journal article supplement (PMC6905444; doi:10.1590/1678-4685-gmb-2018-0212), 2019-11-14
Supplement: 1415-4757-GMB-42-3-2018-0212-20190903-suppl1.pdf [file 1415-4757-GMB-42-3-2018-0212-20190903-suppl1.pdf]

## Supplementary material to: “The perturbed expression of m6A in parthenogenetic mouse embryos”

**Table S1** - Primers for qRT-PCR analysis

| Genes          | Annealing<br>(°C) | Primer sequences (5'→3')   | Reference/accession           |
|----------------|-------------------|----------------------------|-------------------------------|
| <i>METTL3</i>  | 60                | F: GAAACAGCTGGACTCGCTTC    | (Li <i>et al.</i> 2017)       |
|                |                   | R: GGCACGGGACTATCACTACG    |                               |
| <i>METTL14</i> | 60                | F: GCTAAGTCAAACACTCCTCCCA  | (Li <i>et al.</i> 2017)       |
|                |                   | R: TATTCTTCCAGAGGGGGCTC    |                               |
| <i>ALKBH5</i>  | 60                | F: CGCGGTCATCAACGACTACC    | (Zheng <i>et al.</i> 2017)    |
|                |                   | R: ATGGGCTTGAAGTGGAACTTG   |                               |
| <i>FTO</i>     | 60                | F: GACTTGGCTTCCTTACCTG     | (Li <i>et al.</i> 2017)       |
|                |                   | R: CTCACCACGTCCCGAAACAA    |                               |
| <i>YTHDF2</i>  | 60                | F: GAGCAGAGACCAAAAGGTCAAG  | (Zheng <i>et al.</i> 2017)    |
|                |                   | R: CTGTGGGCTCAAGTAAGGTTC   |                               |
| <i>IGF2BP1</i> | 60                | F: ATCGGAGCTGAGGTGGAATA    | (Nguyen <i>et al.</i> , 2014) |
|                |                   | R: CTCGGGGAAAGTAGAACTGC    |                               |
| <i>IGF2BP2</i> | 60                | F: GCAGGATCCCAGCAAATAAA    | (Nguyen <i>et al.</i> , 2014) |
|                |                   | R: GGGCCAACAACCTCGTATAA    |                               |
| <i>GAPDH</i>   | 60                | F: AGGTCGGTGTGAACGGATTTG   | (Zheng <i>et al.</i> 2017)    |
|                |                   | R: TGTAGACCATGTAGTTGAGGTCA |                               |

**References**

Nguyen, L.H., Robinton, D.A., Seligson, M.T., Wu, L.W., Li, L., Rakheja, D., Comerford, S.A., Ramezani, S., Sun, X.K., Parikh, M.S., *et al.* (2014). Lin28b Is Sufficient to Drive Liver Cancer and Necessary for Its Maintenance in Murine Models. *Cancer cell* 26, 248-261.

All other references listed in this table are in the References list of the main text.
